# Supplementary material for: Clonal Heterogeneity in the Neuronal and Glial Differentiation of Dental Pulp Stem/Progenitor Cells
Source: Hindawi journal article supplement (doi:10.1155/2016/1290561), 2016-01-01
Supplement: f1 [file 1290561.f1.pdf]

## Supplemental tables

Supplemental table 1 – Primers used for rt-PCR

| Product | Accession no.  | Primer Sequences (5' → 3')                                       | Product Size (bp) | Tm (°C) |
|---------|----------------|------------------------------------------------------------------|-------------------|---------|
| BLBP    | NM_021272.3    | f: GGACACAATGCACATTCAAGAA<br>r: CCGAACCACAGACTTACAGTTT           | 101               | 60      |
| CD90    | NM_009382.3    | f: GCCTGACAGCCTGCCTGGTGAACCAA<br>r: TGCCGCCACACTTGACCAGCTTGTCTCT | 330               | 60      |
| CD133   | NM_008935.2    | f: GAATGCGCCATGCAGGAGGAAGTGCTT<br>r: GGCTGCTCCCAGACTGCTTAGGCTTG  | 542               | 60      |
| GAPDH   | NM_008084.2    | f: AGACGGCCGCATCTTCTTGTGCAGTGC<br>r: ACATACTCAGCACCGGCCTCACCCCA  | 326               | 60      |
| GLAST   | NM_148938.3    | f: ACCAAAAGCAACGGAGAAGAG<br>r: GGCATTCCGAAACAGGTAATC             | 144               | 60      |
| Musashi | NM_008629.1    | f: GGGGTGGATAAAGTGCTGGCGCAATCG<br>r: CGCTCTACACGGAATTCGGGAACTGGT | 533               | 60      |
| Myt1l   | NM_001093775.1 | f: TGGTCACGTCAGTGGCAAATA<br>r: TGCAAATGGTTTTTCGCTTGGG            | 121               | 60      |
| NF-1    | NM_010910.1    | f: CAAGAGCCGCTTACCCTGCTAACCGA<br>r: CGCTGGTTATGCTACCCACGCTGGTGA  | 392               | 60      |
| P75     | NM_033217.3    | f: CTCAGATGAAGCCAACCACG<br>r: CCTTGTGATCCATCGGCCA                | 133               | 60      |
| Pax6    | NM_001244198.1 | f: TACCAGTGTCTACCAGCCAAT<br>r: TGCACGAGTATGAGGAGGTCT             | 194               | 60      |
| SCA1    | NM_010738.2    | f: ACCTGCCCCTACCCTGATGGAGTCTGT<br>r: TGTGTGCCTCCAGGGTCATGAGCAGCA | 522               | 60      |
| SOX2    | NM_011443.3    | f: GCGGAGTGGAACTTTTGTCC<br>r: CGGGAAGCGTGTACTTATCCTT             | 157               | 60      |

Supplemental table 2 – Primers used for qPCR

| Product | Accession no.  | Primer Sequences (5' → 3')                                   | Product Size (bp) | T <sub>m</sub> (°C) |
|---------|----------------|--------------------------------------------------------------|-------------------|---------------------|
| GAPDH   | NM_008084.2    | f: AGGTCGGTGTGAACGGATTTG<br>r: TGTAGACCATGTAGTTGAGGTCA       | 123               | 60                  |
| Map2    | NM_001039934.1 | f: TGACACTTGGGACCTGGACGAGTAT<br>r: ACACCACTTCTTCAACCAACGCTCA | 105               | 60                  |
| Nestin  | NM_016701.3    | f: CCAAAGAGGTGTCCGATCATC<br>r: CTCCCTTCTTCTTCATCAGCATCT      | 147               | 60                  |
| NF-1    | NM_010910.1    | f: TGAGAAGCACGAAGAGCGAGATGG<br>r: TGAAACTGAGCCTGGTCTCTTCGC   | 135               | 60                  |
| SCA1    | NM_001271416.1 | f: GAGGCAGCAGTTATTGTGGAT<br>r: ACCCAGGATCTCCATACTTTCA        | 99                | 60                  |
